# Supplementary material for: Custom total knee arthroplasty facilitates restoration of constitutional coronal alignment
Source: PubMed Central journal article supplement (PMC8866384; doi:10.1007/s00167-020-06153-8), 2020-07-17
Supplement: 167_2020_6153_MOESM1_ESM.pdf [file 167_2020_6153_MOESM1_ESM.pdf]

Table: Pre-and post-operative coronal alignment according to preoperative deformity (CT) classification

|                      | n   | FMA (deg)               |             |                 |             |                          |             | TMA (deg)               |             |                 |             |                          |             | HKA angle (deg)         |             |                 |             |                          |             |
|----------------------|-----|-------------------------|-------------|-----------------|-------------|--------------------------|-------------|-------------------------|-------------|-----------------|-------------|--------------------------|-------------|-------------------------|-------------|-----------------|-------------|--------------------------|-------------|
|                      |     | Preoperative radiograph |             | Preoperative CT |             | Postoperative radiograph |             | Preoperative radiograph |             | Preoperative CT |             | Postoperative radiograph |             | Preoperative radiograph |             | Preoperative CT |             | Postoperative radiograph |             |
|                      |     | mean ±SD                | (min – max) | mean ±SD        | (min – max) | mean ±SD                 | (min – max) | mean ±SD                | (min – max) | mean ±SD        | (min – max) | mean ±SD                 | (min – max) | mean ±SD                | (min – max) | mean ±SD        | (min – max) | mean ±SD                 | (min – max) |
| <b>Varus Femur</b>   |     |                         |             |                 |             |                          |             |                         |             |                 |             |                          |             |                         |             |                 |             |                          |             |
| Varus Tibia          | 6   | 88.2 ±1.3               | (86 – 89)   | 89.2 ±0.8       | (88 – 90)   | 88.7 ±1.0                | (87 – 90)   | 83.2 ±1.3               | (81 – 85)   | 83.3 ±1.2       | (81 – 84)   | 87.2 ±3.5                | (81 – 91)   | 166.7 ±3.3              | (162 – 172) | 170.2 ±2.8      | (165 – 172) | 175.8 ±4.3               | (168 – 180) |
| Neutral Tibia        | 30  | 89.5 ±1.8               | (85 – 93)   | 89.0 ±0.9       | (87 – 90)   | 88.9 ±2.3                | (84 – 95)   | 86.3 ±2.5               | (81 – 91)   | 87.2 ±1.5       | (85 – 89)   | 88.4 ±1.8                | (86 – 93)   | 171.6 ±4.5              | (162 – 183) | 173.0 ±2.3      | (170 – 179) | 177.3 ±2.6               | (173 – 183) |
| Valgus Tibia         | 5   | 88.2 ±2.5               | (84 – 90)   | 89.2 ±0.8       | (88 – 90)   | 88.6 ±1.5                | (87 – 91)   | 90.2 ±2.5               | (87 – 94)   | 90.8 ±1.8       | (90 – 94)   | 89.4 ±2.2                | (87 – 93)   | 173.6 ±3.6              | (169 – 178) | 175.0 ±2.2      | (172 – 178) | 177.8 ±2.3               | (175 – 180) |
| <b>Neutral Femur</b> |     |                         |             |                 |             |                          |             |                         |             |                 |             |                          |             |                         |             |                 |             |                          |             |
| Varus Tibia          | 34  | 91.6 ±1.8               | (88 – 95)   | 92.4 ±1.4       | (91 – 95)   | 90.3 ±2.2                | (85 – 94)   | 82.6 ±1.6               | (79 – 85)   | 83.1 ±1.0       | (80 – 84)   | 86.3 ±2.1                | (81 – 89)   | 171.5 ±4.2              | (166 – 184) | 173.3 ±2.3      | (169 – 180) | 176.9 ±2.5               | (170 – 181) |
| Neutral Tibia        | 120 | 92.3 ±1.9               | (88 – 97)   | 92.7 ±1.4       | (91 – 95)   | 91.3 ±1.8                | (87 – 96)   | 86.3 ±2.0               | (82 – 91)   | 86.9 ±1.4       | (85 – 89)   | 87.2 ±1.9                | (83 – 92)   | 174.9 ±5.0              | (164 – 195) | 176.3 ±3.8      | (168 – 188) | 178.3 ±1.9               | (173 – 183) |
| Valgus Tibia         | 31  | 92.2 ±1.9               | (89 – 97)   | 92.9 ±1.5       | (91 – 95)   | 91.7 ±2.1                | (88 – 96)   | 90.5 ±1.8               | (87 – 95)   | 91.1 ±1.3       | (90 – 94)   | 89.0 ±2.3                | (84 – 94)   | 180.4 ±4.6              | (172 – 190) | 181.1 ±3.4      | (174 – 188) | 180.3 ±2.1               | (177 – 185) |
| <b>Valgus Femur</b>  |     |                         |             |                 |             |                          |             |                         |             |                 |             |                          |             |                         |             |                 |             |                          |             |
| Varus Tibia          | 3   | 97.0 ±1.0               | (96 – 98)   | 96.7 ±1.2       | (96 – 98)   | 93.7 ±0.6                | (93 – 94)   | 82.3 ±1.5               | (81 – 84)   | 83.3 ±1.2       | (82 – 84)   | 86.7 ±2.5                | (84 – 89)   | 176.3 ±5.5              | (171 – 182) | 177.7 ±3.8      | (175 – 182) | 179.7 ±1.5               | (178 – 181) |
| Neutral Tibia        | 23  | 96.1 ±1.5               | (92 – 99)   | 97.1 ±1.2       | (96 – 99)   | 94.3 ±1.9                | (90 – 98)   | 87.6 ±1.8               | (85 – 92)   | 87.3 ±1.4       | (85 – 89)   | 86.9 ±2.1                | (84 – 93)   | 183.1 ±4.7              | (174 – 189) | 183.8 ±3.6      | (177 – 191) | 181.1 ±2.1               | (176 – 185) |
| Valgus Tibia         | 6   | 96.5 ±1.8               | (94 – 99)   | 97.5 ±1.0       | (96 – 99)   | 94.3 ±1.4                | (92 – 96)   | 90.7 ±1.8               | (88 – 93)   | 91.5 ±1.0       | (90 – 93)   | 89.0 ±1.5                | (87 – 91)   | 188.0 ±3.6              | (183 – 192) | 188.0 ±3.2      | (184 – 192) | 183.0 ±0.9               | (182 – 184) |

Abbreviations: FMA, femoral mechanical angle; TMA, tibial mechanical angle; HKA, hip knee ankle; deg, degree; SD, standard deviation
